# Supplementary material
Source: PubMed Central journal article supplement (PMC2644161)
Supplement: 0809449106_0809449106SI.pdf [file 0809449106_0809449106SI.pdf]

# Supporting Information

Carneiro *et al.* 10.1073/pnas.0809449106

## SI Text

**Mouse Genotyping.** Mouse genotyping was performed (The Jackson Laboratories, Bar Harbor, Maine) using the genomic DNA extracted using the Extract-N-AMP tissue PCR kit (Sigma) according to the manufacturer's instructions. The Gly-39 allele was identified by PCR amplification with the primers: 5' CCA AGA ACC AAG AGC TAG TCA GGG TCC TTG GCA GAT GGG C; 5' TTA GGCTCA CGT CAG CTA CC. For Glu39Gly, PCR conditions were as follows: 1 cycle (5 min at 95°C) and 40 cycles (45 s 95°C, 45 s at 65°C, 1 min at 72°C) using 0.8  $\mu$ M dNTPs and Taq Polymerase (Promega, Madison, Wisconsin), followed by digestion with HaeIII for 1 h at 37°C and submitted to electrophoresis. For genotyping of Arg152Lys we used sense primer AACTGTGAGCTCCACGCC and antisense primer CCTTTGAAAATCGGGCAGATC at 94°C for 5 min followed by 35 cycles of 94°C 30 sec, 52°C 30 sec, and 72°C 30 sec and finishing with a 5-min extension cycle at 72°C to produce a 213 bp amplicon subjected to restriction digestion with MnlI.

**Marble Burying.** Mice were housed with same sex littermates (2–5 per cage). Before beginning the marble burying assay, the mice

were placed in individual cages (16  $\times$  32  $\times$  13 cm) containing 5 cm of beta chip sawdust bedding for 15 min to acclimate to the new surroundings. After 15 min the mice were briefly removed from the cage, the bedding was smoothed and slightly compacted, and 25 1.5-cm blue marbles were placed in the cage in 5 rows. The mice were returned to the cage and allowed 30 min to investigate the marbles. At the end of the study, the mice were returned to their home cages and the number of marbles buried at least two-thirds of the way in the bedding was recorded.

**Nestlet Shredding.** Mice were housed with same sex littermates (2–5 per cage). Before beginning the nestlet shredding experiment, the mice were placed in individual cages (16  $\times$  32  $\times$  13 cm) for 15 min to acclimate to the new surroundings. After a 15-min acclimation, a preweighed cotton nestlet ( $\sim$ 5  $\times$  5  $\times$  0.3 cm,  $\sim$ 2 g) was placed in the middle of the cage. After 60 min, the mouse was removed and the portion of the nestlet not shredded for nest building was reweighed and the weight was subtracted from the initial weight of the nestlet.

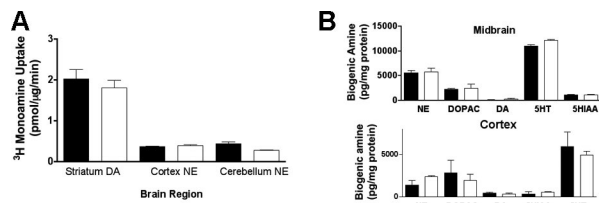

**Fig. S1.** Monoamine uptake (A) and neurochemistry (B) of inbred mouse lines bearing the ER (CBA/J, ■) or GK (C57BL/6J, □) mSERT haplotype. No significant differences were found in dopamine (DA), norepinephrine (NE) uptake. No differences were found in monoamine tissue levels between the two strains. Student's *t*-test for DA:  $P = 0.456$ . One-way ANOVA analysis of variance for NE: cortical NE:  $P < 0.05$ , cerebellar NE:  $P < 0.05$ .

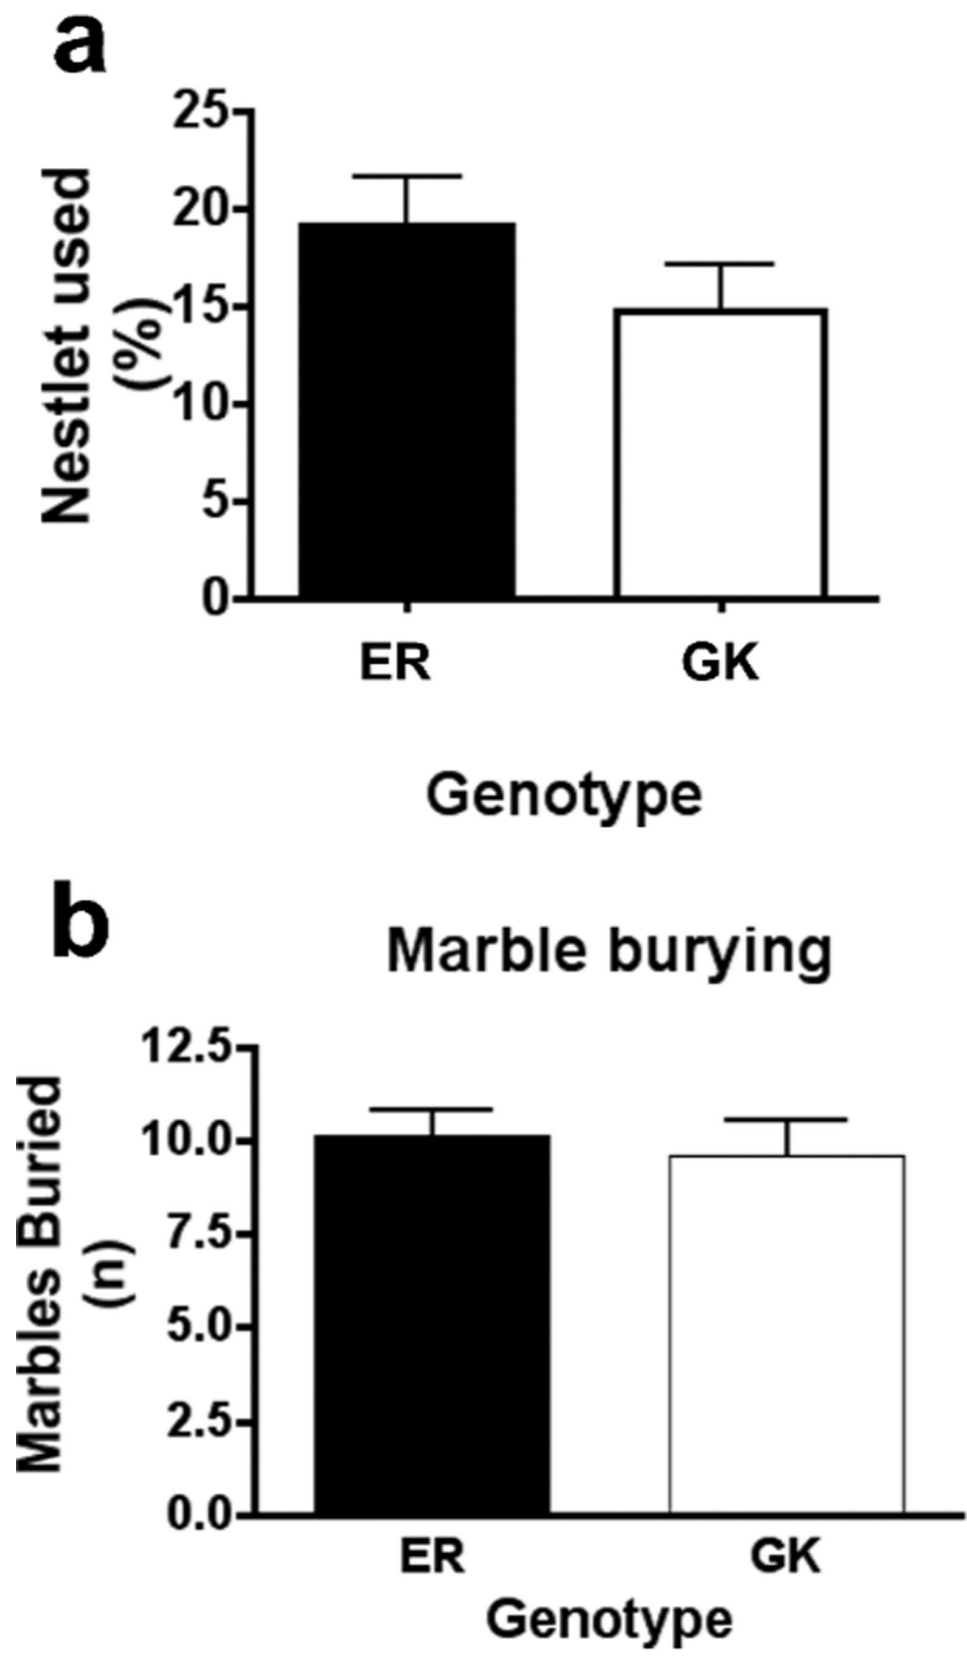

Fig. S2. Nestlet shredding (females) and marble burying (males) behavior in BXD mouse lines. No significant differences were found between ER and GK lines. Nestlet shredding Student's *t*-test:  $P = 0.116$ ,  $n = 5$  lines (ER) and 6 lines (GK). Marble burying Student's *t*-test:  $P = 0.8915$ ,  $n = 8$  lines (ER), 7 lines (GK).

## Slc6a4 Phenotypes

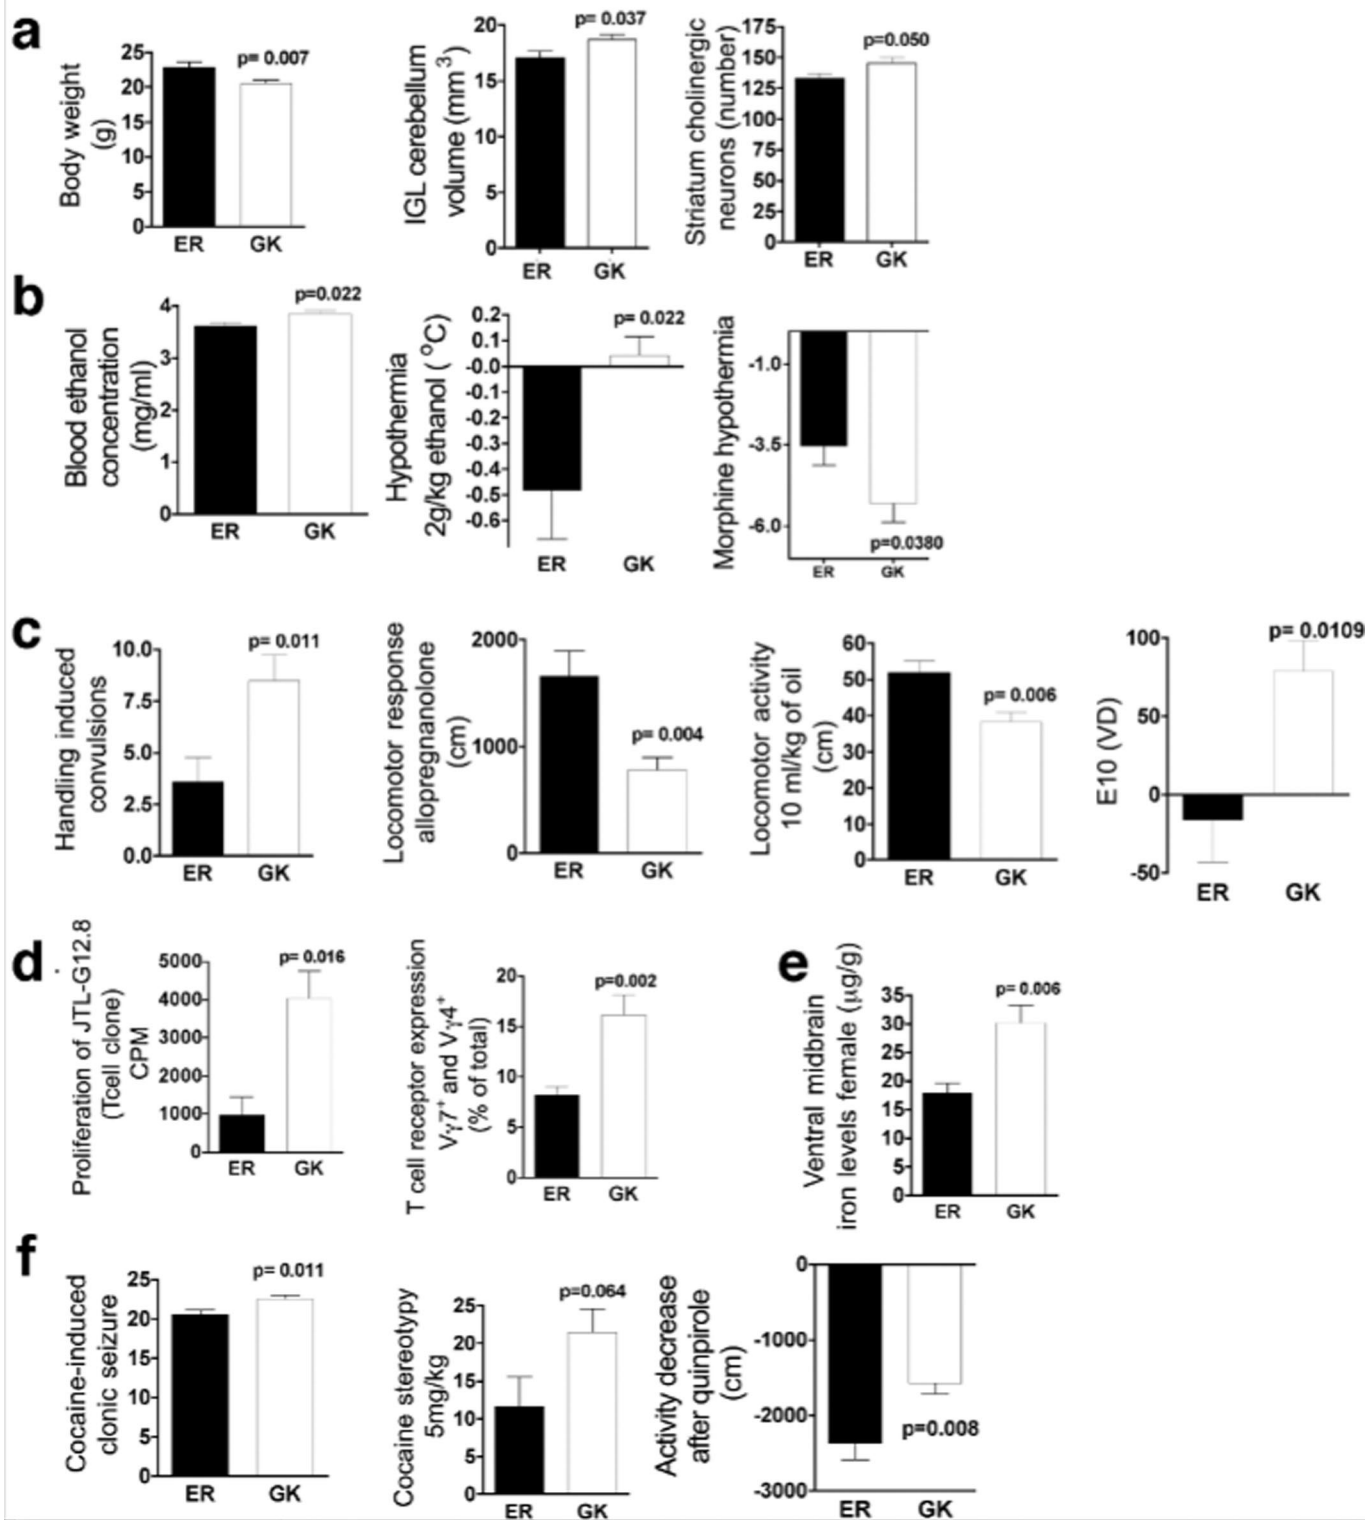

**Fig. S3.** Phenotypes influenced by mSERT haplotype in BXD lines, where (■) represent ER lines and (□) GK lines (Pubmed ID shown in parenthesis). (a) Anatomical phenotypes include body weight (979472), cerebellar volume (11438585), and number of striatal cholinergic neurons (8968368). (b) Ethanol-associated traits: blood ethanol concentration (10656187), hypothermia induced by 2g/kg ethanol (8627539), and morphine hypothermia (1632590). (c) Anxiety-related phenotypes: handling-induced convulsions (8512534), total distance (cm) traveled in response to 10 mg/kg allopregnanolone (11895174), total distance traveled after 10 mL/kg oil (11106859), and “velocity difference” between the light and dark compartments from the 0–10’ interval after injection with 1.8 g/kg of ethanol (data not shown). (d) Immune system phenotypes: proliferation of T cells (6203970) and T cell receptor expression (9159147). (e) Iron midbrain levels in females. (f) DA-signaling phenotypes: cocaine dose necessary to induce clonic seizure (mg/kg) (10734168), cocaine stereotypy (5 mg/kg) (10591541), and quinpirole-induced decrease in activity (110540779).

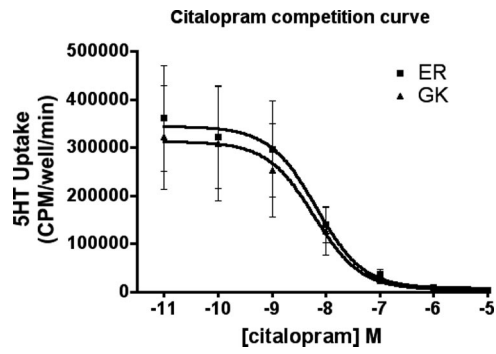

**Fig. S4.** Analysis of mSERT haplotype influence on citalopram sensitivity. Cells were transfected with either the ER or GK mSERT cDNAs and evaluated for [3H]5-HT transport as described in *Experimental Procedures* in the presence of increasing concentrations of unlabeled citalopram. Citalopram competition curves show no differences between ER and GK citalopram binding affinities  $EC_{50}$  (ER =  $6.5175e-009 \pm 0.3791M$ ; GK =  $5.9044e-009 \pm 0.4331M$ ). Student's *t*-test:  $P = 0.942$ ,  $n = 5$ .

**Table S1. Genotypes of common inbred mouse lines for *Tph2* and *Slc6a4* polymorphisms**

| Mouse line  | Tph2 (aa pos 447) | Slc6a4 (aa pos 39/152) |
|-------------|-------------------|------------------------|
| 129Xi/J     | Pro               | Glu/Arg                |
| A/J         | Arg               | Glu/Arg*               |
| AKR/J       | Pro               | Glu/Arg*               |
| BALB/cJ     | Arg               | Glu/Arg                |
| BUB/J       | Pro               | Glu/Arg*               |
| BTBR T + tf | Pro               | Glu/Arg*               |
| C3H/J       | Pro               | Glu/Arg*               |
| C57BLKS/J   | Pro               | Glu/Arg                |
| C57BL/6J    | Pro               | Gly/Lys                |
| C57BL/10J   | Pro               | Gly/Lys                |
| C57BR/J     | Pro               | Gly/Lys                |
| C57L/J      | Pro               | Gly/Lys                |
| C58/J       | Pro               | Glu/Arg                |
| CAST/Ei     | Pro               | Gly/Lys                |
| CBA/J       | Pro               | Glu/Arg                |
| CE/J        | Pro               | Glu/Arg*               |
| CZECHII/EiJ | Pro               | Glu/Arg*               |
| DBA/J       | Arg               | Glu/Arg                |
| FVB/NJ      | Pro               | Glu/Arg*               |
| SPRET/J     | Pro               | Glu/Arg*               |
| JF1/MS      | Pro               | Glu/Arg*               |
| KK/HIJ      | Pro               | Glu/Arg*               |
| LP/J        | Pro               | Glu/Arg*               |
| MA/MyJ      | Pro               | Glu/Arg*               |
| MOLF/EiJ    | Pro               | Glu/Arg                |
| MSM/Ms      | Pro               | Glu/Arg*               |
| NON/LtJ     | Pro               | Glu/Arg*               |
| NZB/BINJ    | Pro               | Glu/Arg*               |
| NZW/LacJ    | Pro               | Glu/Arg*               |
| PERA/EiJ    | Pro               | Glu/Arg*               |
| PL/J        | Pro               | Glu/Arg*               |
| RIIS/J      | Pro               | Glu/Arg*               |
| SEA/GnJ     | Arg               | Glu/Arg*               |
| SJL/J       | Pro               | Glu/Arg*               |

\*Data from the Mouse Phenome database, not confirmed by authors.

Table S2. Traits impacted by *Slc6a4* and *Tph2*

| ID    | Pubmed   | Phenotype                                                                         | Sample | <i>P Tph2</i> | <i>P Slc6a4</i> |
|-------|----------|-----------------------------------------------------------------------------------|--------|---------------|-----------------|
| 10647 | 11529276 | Body weight [g]                                                                   | 35     | 0.9256055     | 0.0023588       |
| 10246 | 14744041 | Ventral midbrain iron levels, female [ug/g]                                       | 15     | 0.1599624     | 0.0032347       |
| 10465 | 9159147  | T cell receptor expression, V-gamma-7 positive and V-gamma-4]                     | 25     | 0.415533      | 0.0030925       |
| 10454 | 11895174 | Locomotor response to 10 mg/kg allopregnanolone                                   | 24     | 0.6072188     | 0.0032256       |
| 10237 | 6203970  | Proliferation of JTL-G12.8 (T cell clone) without 50 $\mu$ g/mL GAT               | 25     | 0.6465703     | 0.0042395       |
| 10245 | 14744041 | Ventral midbrain iron levels, male [ug/g]                                         | 15     | 0.119462      | 0.0041624       |
| 10051 | 11054779 | Activity decrease after administration of 0.03 mg/kg quinpirole                   | 24     | 0.1576165     | 0.0034425       |
| 10241 | 14744041 | Caudate-putamen iron levels, male [ug/g]                                          | 15     | 0.2266541     | 0.0055225       |
| 10084 | 8627539  | Hypothermia tolerance (positive scores) or sensitization (negative scores) 2 g/kg | 23     | 0.1133265     | 0.0085527       |
| 10570 | 11106859 | Locomotor activity after 10 mL/kg of oil in first 15 min of 30-min activity test  | 22     | 0.7054719     | 0.0083203       |
| 10276 | 10591541 | Dopamine transporter caudate-putamen, males                                       | 18     | 0.784576      | 0.0080978       |
| 10027 | 8512534  | Nitrous oxide withdrawal handling induced convulsions, difference from baseline   | 19     | 0.3124916     | 0.0119643       |
| 10203 | 10734168 | Cocaine in mg/kg (infused via tail vein) to induce clonic seizure [mg/kg]         | 24     | 0.8513991     | 0.0141609       |
| 10272 | 10591541 | Drd2 expression in ventral midbrain, male and female mean                         | 18     | 0.074708      | 0.0163878       |
| 10136 | 10581484 | Ethanol acceptance, female raw mean consumption                                   | 23     | 0.0660183     | 0.0142815       |
| 10270 | 10591541 | Drd2 expression in ventral midbrain, males                                        | 18     | 0.1013146     | 0.0141119       |
| 10040 | 10656187 | Blood ethanol concentration (BEC) from the retro-orbital sinus                    | 24     | 0.2886647     | 0.0252485       |
| 10581 | 7695038  | Ethanol acceptance total consumption over 24 hr, female [g/kg]                    | 21     | 0.2352512     | 0.0370645       |
| 10064 | 9655868  | Area under the 25-hr curve for withdrawal following 72 hr exposure to air         | 25     | 0.0058179     | 0.286601        |
| 10047 | 11054779 | Tolerance to quinpirole induced hypothermia on day 2 as compared to day 1         | 24     | 0.0057739     | 0.5700668       |
| 10350 | 12183685 | Ethanol induced ataxia, time for regain of balance on dowel test (1) [min]        | 30     | 0.0132397     | 0.0511413       |
| 10048 | 11054779 | Tolerance to quinpirole induced hypothermia on day 3 as compared to day 1         | 24     | 0.0103794     | 0.5423341       |
| 10599 | 14657177 | Total lateral geniculate nucleus endothelial cell number $\times$ 1000            | 32     | 0.078951      | 0.3134177       |
| 10669 | 10102277 | Retinal area [mm <sup>2</sup> ]                                                   | 26     | 0.0583644     | 0.1560597       |
| 10347 | 12183685 | Ethanol induced ataxia, initial sensitivity blood ethanol concentrations (BECo)   | 30     | 0.0240444     | 0.0637918       |

\**P* values are derived from the additive linear mixed model used to identify novel phenotypes.

Table S3. Traits impacted by *Slc6a4* and *Tph2* epistasis

| ID    | Pubmed   | Phenotype                                                                                | N  | P value   |
|-------|----------|------------------------------------------------------------------------------------------|----|-----------|
| 10649 | 9412494  | Retinal ganglion cell number ( $\times 1000$ )                                           | 26 | 0.0005229 |
| 10670 | 10102277 | Retinal ganglion cell number ( $\times 1000$ )                                           | 26 | 0.0005229 |
| 10600 | 14657177 | Retinal ganglion number ( $\times 1000$ )                                                | 34 | 0.0008895 |
| 10650 | 9412494  | Retinal ganglion cell number (residual cells $\times 1000$ corrected for brain and body) | 26 | 0.0019426 |
| 10780 | 15922957 | Coagulation Factor IX (cF.IX) levels following injection of $3e11$ vg/mouse AAV2-c       | 18 | 0.0033972 |
| 10752 | 12925895 | Total cholesterol levels following 16-week high-fat diet                                 | 18 | 0.0042743 |
| 10668 | 10102277 | Lens weight [mg]                                                                         | 26 | 0.0046043 |
| 10579 | 8748968  | Plasma corticosterone 6 hr post EtOH female [ug/dl]                                      | 25 | 0.0051004 |
| 10795 | 16407118 | Cell proliferation in the adult dentate gyrus (Ki67; residuals)                          | 29 | 0.0058015 |
| 10001 | 11438585 | Cerebellum weight [mg]                                                                   | 34 | 0.0097921 |
| 10753 | 12925895 | LDL cholesterol levels following 16-week high-fat diet                                   | 18 | 0.0099457 |
| 10827 |          | Total iron-binding capacity of blood                                                     | 29 | 0.0215391 |
| 10587 | 7625571  | Ethanol acceptance-consumption of 10% ethanol in 24 h after 24 h of water                | 21 | 0.0220154 |
| 10671 | 10102277 | Eye weight, regression corrected for age, sex, body and brain weight (mg)                | 26 | 0.0229984 |
| 10725 | 16910173 | Frontal cortex zinc levels, females                                                      | 15 | 0.0239297 |

\*P values are derived from the additive linear mixed model used to identify novel phenotypes.
